# Supplementary material
Source: Research Square preprint supplement (doi:10.21203/rs.3.rs-8729100/v1)
Supplement: Supplementary file 1 [file db6d50ab710d0dce672cce25.docx]

**Additional file 1: Table S1. Final tuned hyperparameters for the machine-learning models.**

This table summarizes the final hyperparameter settings used for the random forest (RF), decision tree (DT), and extreme gradient boosting (XGBoost) classification models after tuning.

| **Model** | **Algorithm / Engine** | **Hyperparameter** | **Final value** |
| --- | --- | --- | --- |
| RF | rand_forest / ranger | mtry | 7 |
| RF | rand_forest / ranger | trees | 906 |
| RF | rand_forest / ranger | min_n | 4 |
| RF | rand_forest / ranger | importance | permutation |
| DT | decision_tree / rpart | cost_complexity | 1e-10 |
| DT | decision_tree / rpart | tree_depth | 3 |
| DT | decision_tree / rpart | min_n | 5 |
| XGB | boost_tree / xgboost | mtry | 11 |
| XGB | boost_tree / xgboost | trees | 338 |
| XGB | boost_tree / xgboost | min_n | 3 |
| XGB | boost_tree / xgboost | tree_depth | 6 |
| XGB | boost_tree / xgboost | learn_rate | 0.00662610839061793 |
| XGB | boost_tree / xgboost | loss_reduction | 4.01280238907282e-06 |
| XGB | boost_tree / xgboost | sample_size | 0.597786694928072 |
